# Supplementary material
Source: Springer Nature journal article supplement (http://www.springermedizin.de/resource/supplementary/12891_2007_353_MOESM1_ESM.pdf/9511122)

**A**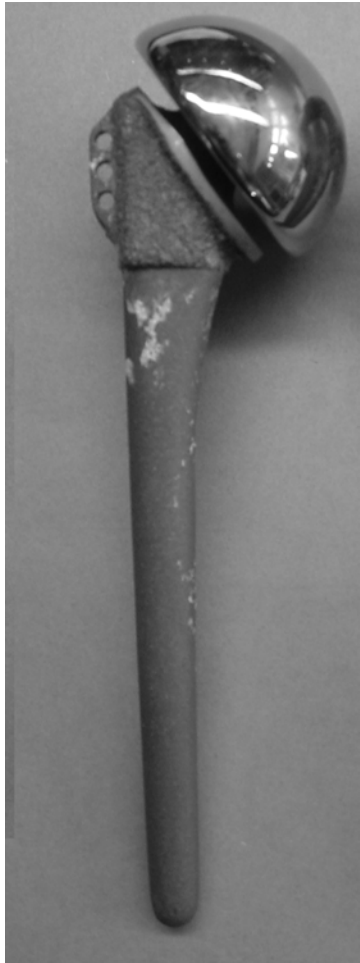**B**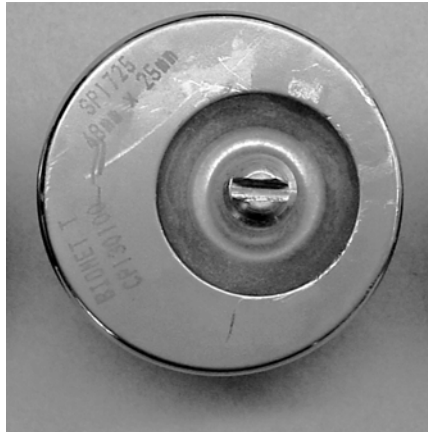**C**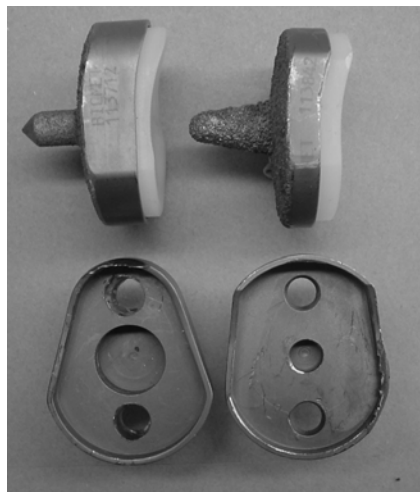

Supplement: MOESM1 [file 9511122]
